# Supplementary material
Source: Royal Society of Chemistry journal article supplement (doi:10.1039/d6lf00091f)
Supplement: d6lf00091f1.pdf [file d6lf00091f1.pdf]

*Supporting Information*

**A Cerium-Based MOF: Dual-Functional Catalyst  
for Organic Pollutant Remediation**

## 1. Experimental section:

Ceric ammonium nitrate ( $(\text{NH}_4)_2\text{Ce}(\text{NO}_3)_6$ ) and terephthalic acid were procured from Sigma-Aldrich and used without any further purification. Distilled water was used as green solvent for synthesis. The synthesis of Ce-BDC was carried out following a previously reported method [1]. Initially, 0.274 g (0.5 mM) of Ceric(IV) ammonium nitrate in 5 mL distilled water (Solution 1) and 0.166 g (1 mM) of BDC in 5 mL DMF (Solution 2) stirred for 30 minutes. Then solution 1 was added slowly to Solution 2 under vigorous stirring. The resulting mixture was transferred to a Teflon lined autoclave and heated at 130°C for 6 hours. The resulted light-yellow particles were centrifuged, washed three times with DMF and water, refluxed in ethanol for 30 hours, and dried at 80 °C overnight to obtain the final product. The dried product was ground in to fine particles for characterization.

[1] M. Lammert, M. T. Wharmby, S. Smolders, B. Bueken, A. Lieb, K. A. Lomachenko, D. De Vos and N. Stock, *Chem. Commun.*, 2015, **51**, 12578–12581.

## 2. Characterization Techniques

The crystalline structure and lattice parameters were analyzed by Powder X-ray Diffraction (PXRD) using a Bruker D8 Advance diffractometer equipped with Cu-K $\alpha$  radiation ( $\lambda = 0.15406$  nm). Functional groups were identified using Fourier-transform infrared (FT-IR) spectroscopy (Thermo Scientific Nicolet iS5). Raman spectroscopy, conducted on a Renishaw Invia Raman microscope with a 632 nm laser and 10 s exposure time, provided insights into molecular vibrations. Optical absorption properties were assessed through UV-Visible diffuse reflectance spectroscopy (UV-Vis DRS) using a Jasco V-770 spectrophotometer. Surface morphology was investigated via field emission scanning electron microscopy (FE-SEM) using a Gemini SEM 450 equipped with Tungsten and LaB $_6$  filament sources. Nitrogen adsorption-desorption isotherms were recorded at 77 K with a Quantachrome analyzer to estimate surface area, pore size, and volume distribution. Elemental composition and oxidation states were examined by X-ray photoelectron spectroscopy (XPS) using Thermo Scientific Escalab 250Xi with Al K $\alpha$  radiation. Electrochemical behaviour and redox properties were evaluated through cyclic voltammetry (CV) using a BioLogic electrochemical workstation configured with a three-electrode system: Ag/AgCl (reference), platinum gauze (counter), and graphite (working) electrodes.

### 3. Field emission scanning microscopy (FESEM):

**Fig. S1, S2.** Field emission scanning microscopy (FESEM) images of Ce-BDC. **Fig. S3, S4.** Field emission scanning microscopy (FESEM) images of Pd@Ce-BDC. Scale bars are included in each paragraph.

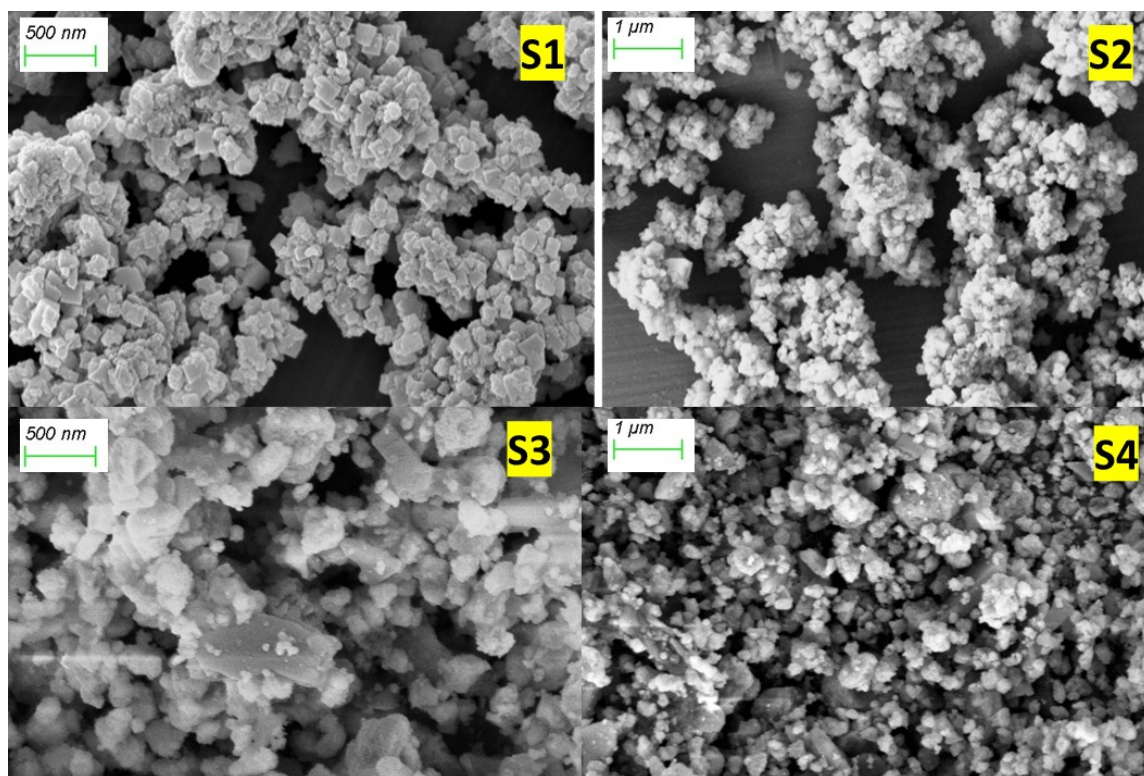

19-01-2026 | S2 | Area 2 | Selected Area 1

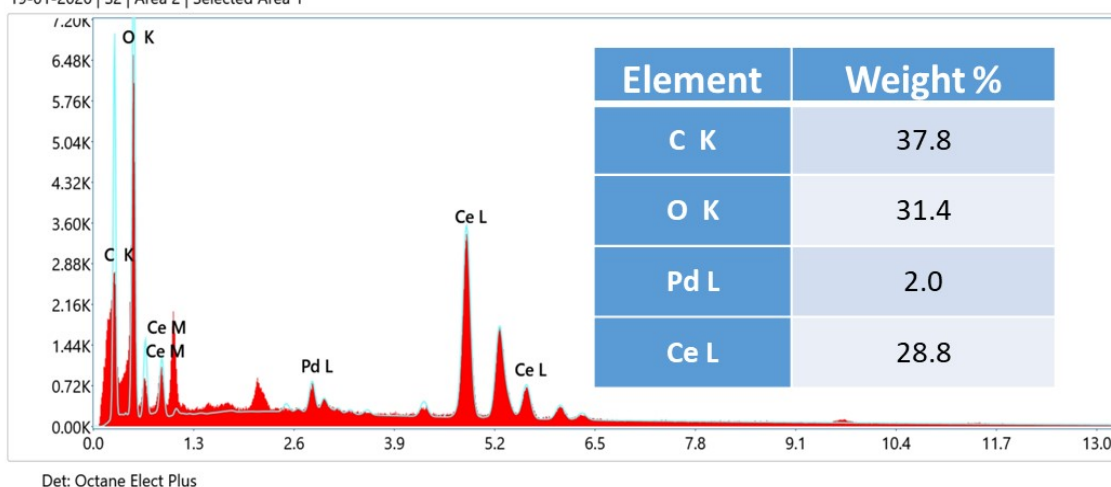

FESEM analysis of Ce-BDC (Fig. S1 and S2) revealed the presence of irregularly shaped, intergrown nanoparticles with a tendency to form aggregated clusters. The particles displayed rough surfaces and heterogeneous morphology matches with the literature [2].

## References for FESEM:

[2] J. He, C. Pei, Y. Yang, B. Lai, Y. Sun and L. Yang, *J. Clean. Prod.*, 2021, **321**, 128778.

## 4. Scavenger Experiment

Fig. S5. Effect of various trapping agents in the presence of Pd@Ce-BDC for the degradation of Cr(VI)

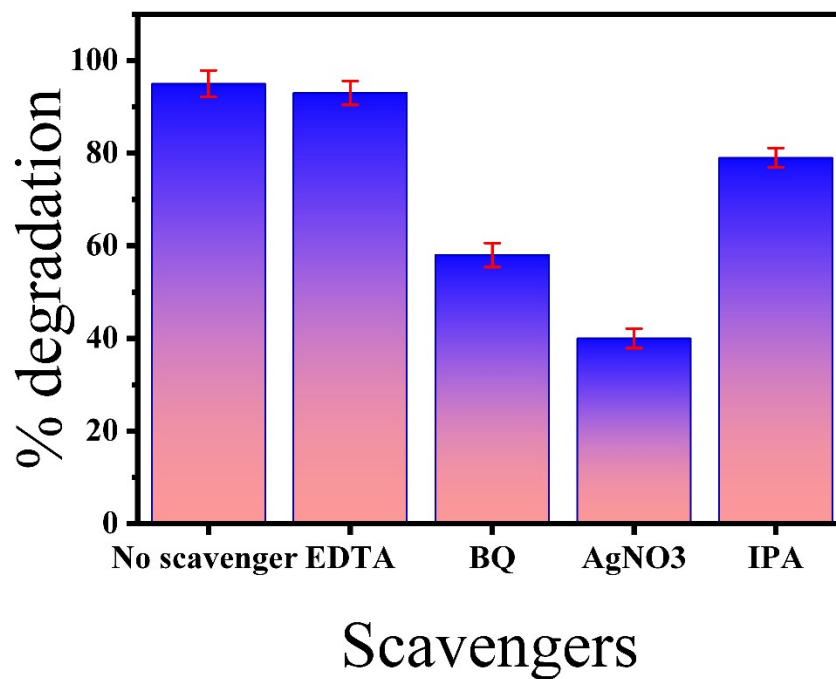

## 5. BET surface area

Fig. S6. N<sub>2</sub> adsorption/desorption isotherm of Pd@Ce-BDC at 77 K.

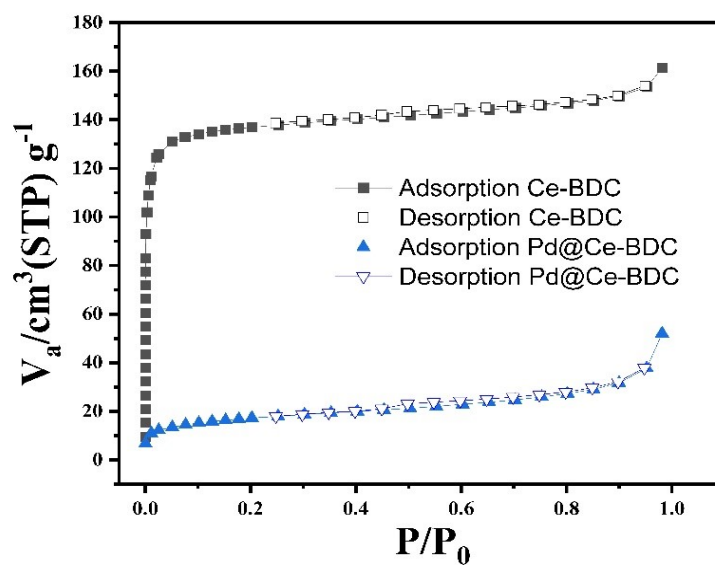

## 6. Full XPS spectrum

**Fig. S7.** Full XPS survey of (a) Pd@Ce-BDC (b) C 1s & (c) O 1s

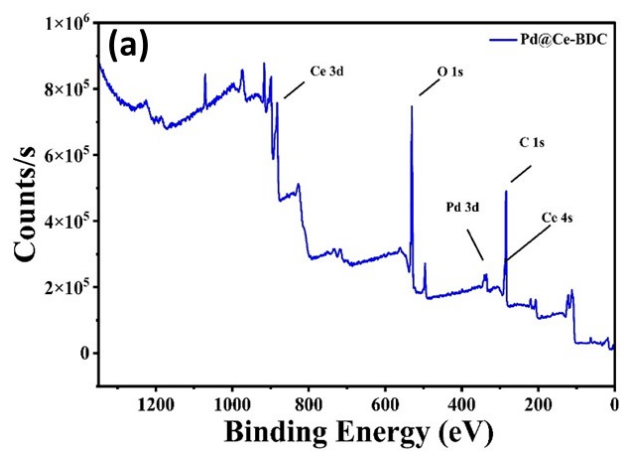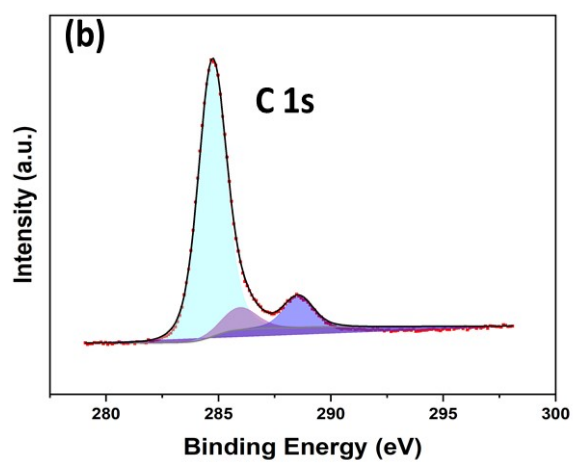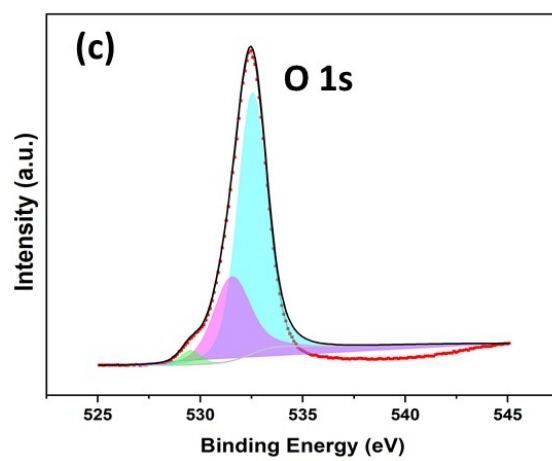

## 7. Recyclability of Pd@Ce-BDC

**Fig. S8 (a).** Recyclability after reduction of 4-NP using Pd@Ce-BDC

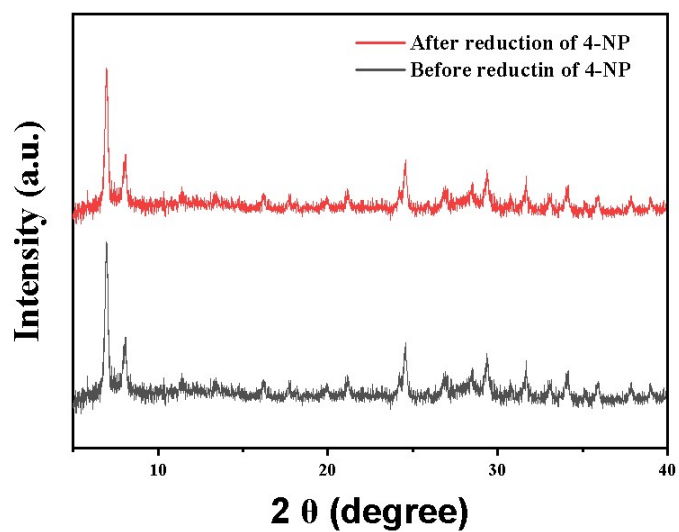

**Fig. S8 (b).** Recyclability after reduction of Cr(VI) using Pd@Ce-BDC

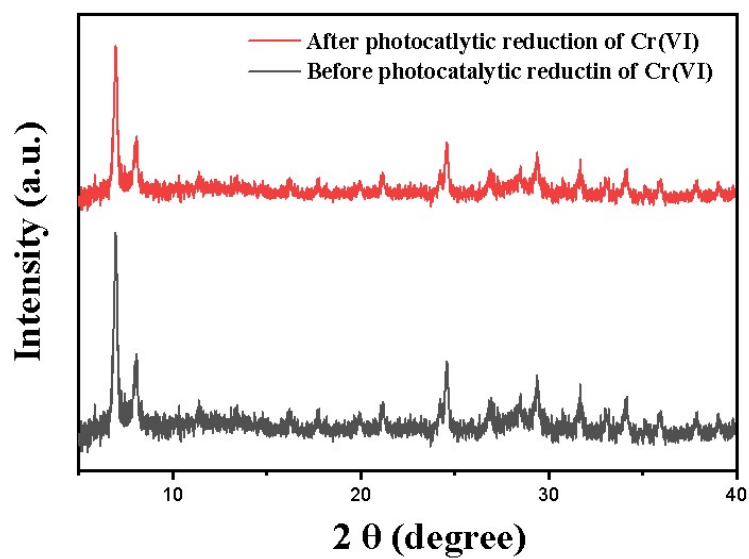

**Table S1.** Comparison of 4-NP & Cr(III) reduction using other MOF/NPs and present work.

| Catalyst                                | Target pollutant | Time taken (min) | Efficiency (%) | Rate constant           | References |
|-----------------------------------------|------------------|------------------|----------------|-------------------------|------------|
| Ag-CeO <sub>2</sub>                     | NP               | 10               | -              | 0.656 min <sup>-1</sup> | [8]        |
| CeO <sub>2</sub> /Ni MOF                | NP               | -                | 97.6%          | 1.102                   | [9]        |
| Au-Pd/Ce-MOF-808                        | NP               | 18               | 92             | 0.141                   | [10]       |
| Ce-BDC/PVDF composite film              | Cr(VI)           | 120              | 95.9%          | 0.02 min <sup>-1</sup>  | [11]       |
| CAU-1/Ce-BDC-NH <sub>2</sub>            | Cr(VI)           | 75               | 40.3%          | -                       | [12]       |
| g-C <sub>3</sub> N <sub>4</sub> /Ce-BDC | Cr(VI)           | 90               | 98             | -                       | [13]       |
| Pd@Ce BDC                               | NP               | -                | 95%            | 0.253 min <sup>-1</sup> | This work  |
| Pd@Ce BDC                               | Cr(VI)           | 25               | 94%            | 0.206 min <sup>-1</sup> | This work  |

### **References for Table S1:**

[8] Ismail A, Alsouz MA, Almashhadani HA, Khan MF, Zahid M. An efficient Ag decorated CeO<sub>2</sub> synergetic catalyst for improved catalytic reduction of lethal 4-nitrophenol. *Chemical Physics Impact*. 2023 Jun 1;6:100173.

[9] Zhao, H., Pang, X., Huang, Y., Ma, C., Bai, H., & Fan, W. (2022). CeO<sub>2</sub>/Ni-MOF with Synergistic Function of Enrichment and Activation: Efficient Reduction of 4-Nitrophenol Pollutant to 4-Aminophenol. *Inorganic Chemistry*, 61(49), 19806-19816.

[10] Hassan, H. M., Alruwaili, H. A., Alhumaimess, M. S., Alanazi, A. H., El-Aassar, M. R., Alshammari, M. S., ... & Alsohaimi, I. H. (2025). Sustainable nitrophenol reduction using Ce-mof-808-supported bimetallic nanoparticles optimized by response surface methodology. *Environmental Research*, 264, 120340.

[11] Valizadeh, Z., Hosseini, S. M., Cheraghi, R., & Safarifard, V. (2025). Polyvinylidene fluoride supported Ce-BDC thin film towards Cr (VI) photoreduction. *Materials Research Bulletin*, 185, 113304.

[12] Goudarzi, M. D., Khosroshahi, N., & Safarifard, V. (2022). Exploring novel heterojunctions based on the cerium metal–organic framework family and CAU-1, as dissimilar structures, for the sake of photocatalytic activity enhancement. *RSC advances*, 12(50), 32237-32248.

[13] Maged, S., El-Borady, O. M., El-Hosainy, H., & El-Kemary, M. (2023). Efficient photocatalytic reduction of p-nitrophenol under visible light irradiation based on Ag NPs loaded brown 2D g-C<sub>3</sub>N<sub>4</sub>/g-C<sub>3</sub>N<sub>4</sub> QDs nanocomposite. *Environmental Science and Pollution Research*, 30(55), 117909-117922.
